# Supplementary material
Source: ML conference proceedings conference paper supplement (https://openaccess.thecvf.com/content/CVPR2026/html/Hu_MultiAnimate_Pose-Guided_Image_CVPR_2026_paper.html)
Supplement: Supplementary file 1 [file Hu_MultiAnimate_Pose-Guided_Image_CVPR_2026_supplemental.pdf]

# MultiAnimate: Pose-Guided Image Animation Made Extensible

## Supplementary Material

### 001 1. t-SNE Analysis of Latent Tokens

002 To illustrate the discriminatory power of our method, we  
003 visualize the feature distribution within the latent space. We  
004 extract the patchified latent tokens corresponding to each  
005 individual by leveraging their respective tracking masks.  
006 These person-specific latent features are then subjected to  
007 dimensionality reduction using t-SNE for a clear 2D repre-  
008 sentation.

009 As depicted in Fig. 1, the left panel showcases the  
010 results achieved with our proposed method, while the  
011 right panel presents the corresponding visualization for  
012 UniAnimate-DiT. The distinct, well-clustered groups in our  
013 result demonstrate that our framework effectively disentangles  
014 the identities in the latent space, thereby preventing  
015 person confusion during multi-person animation.

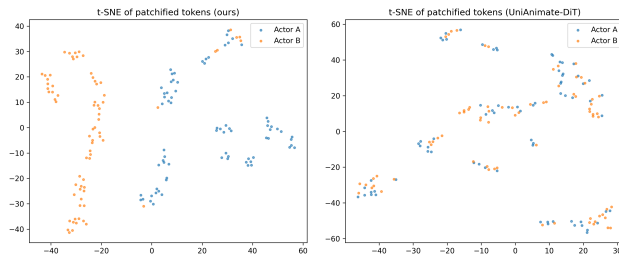

Figure 1. t-SNE visualization of patchified latent tokens. Left: Our method. Right: UniAnimate-DiT. Our approach clearly distinguishes latent features for different individuals, indicating successful identity disentanglement.

### 016 2. Extended Multi-Actor Comparative Results

017 We present additional qualitative comparisons focusing on  
018 multi-actor image animation.

019 Given that previous evaluations demonstrated consis-  
020 tently weaker performance for Dispose and MimicMotion,  
021 we primarily focus our extended comparative results on  
022 VACE and UniAnimate-DiT. Our method consistently ex-  
023 hibits superior performance.

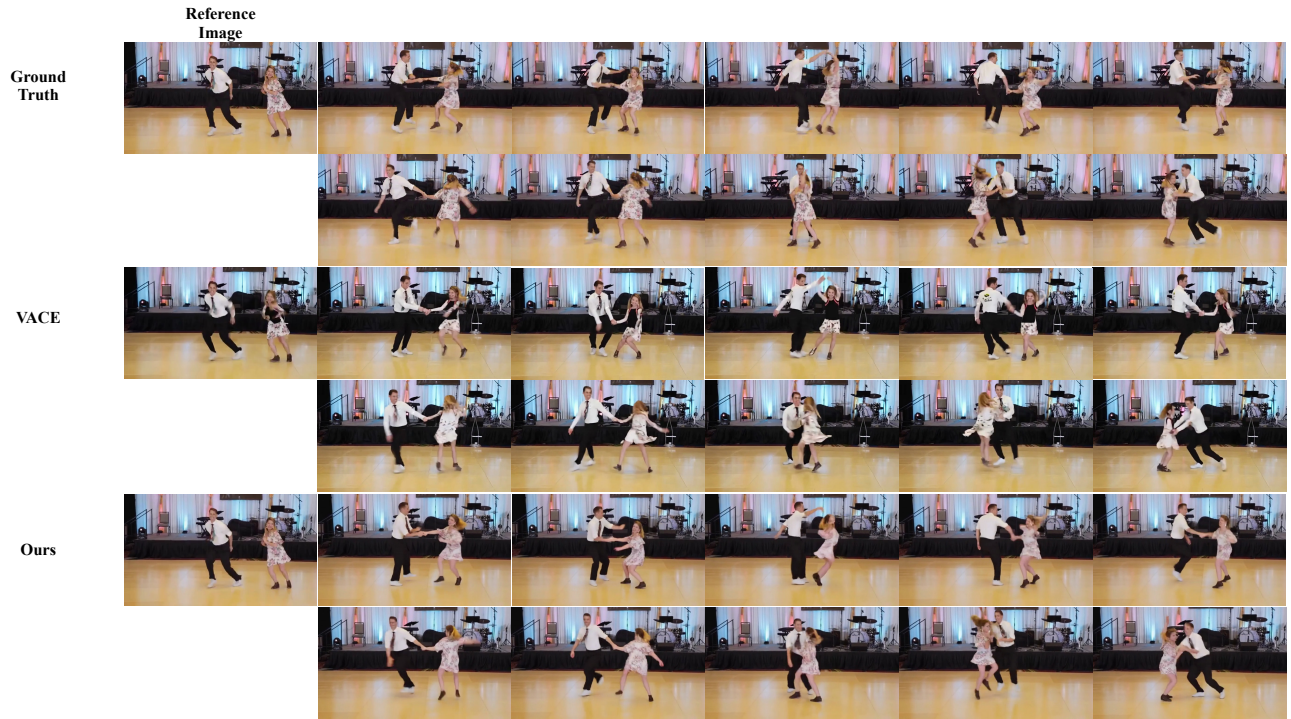

Figure 2. More comparing examples.

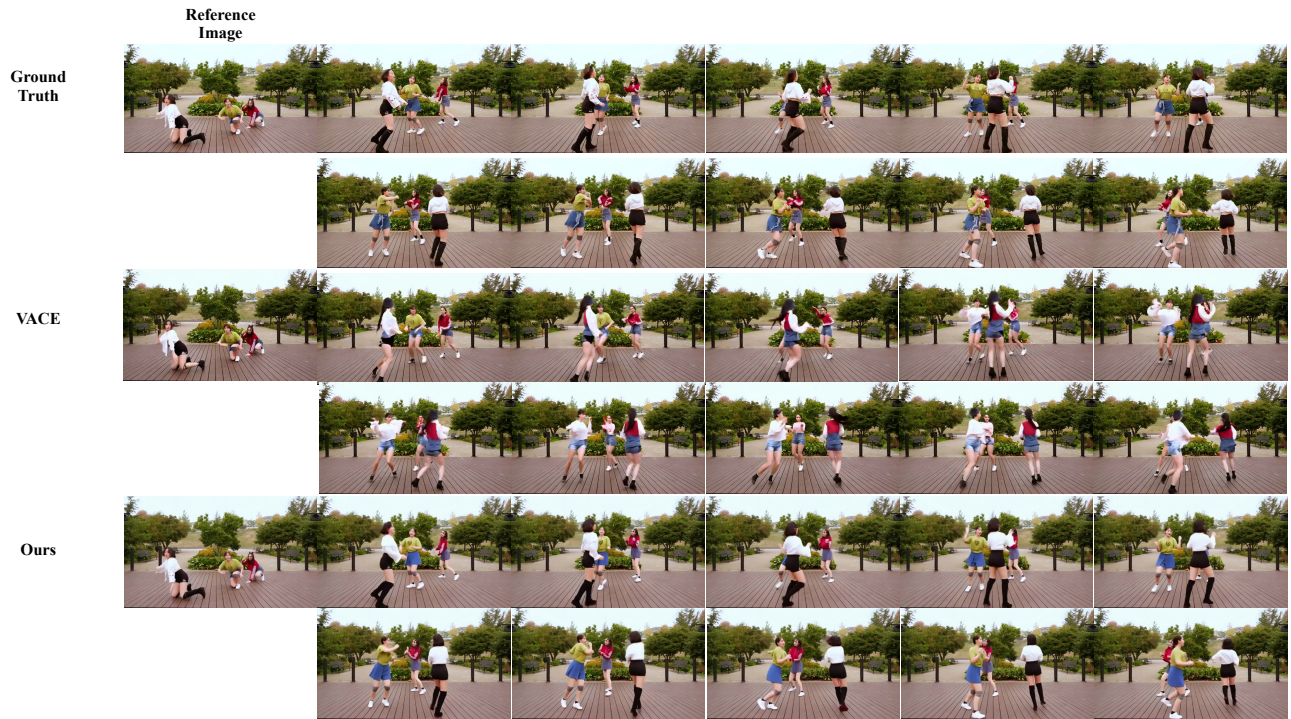

Figure 3. More comparing examples.

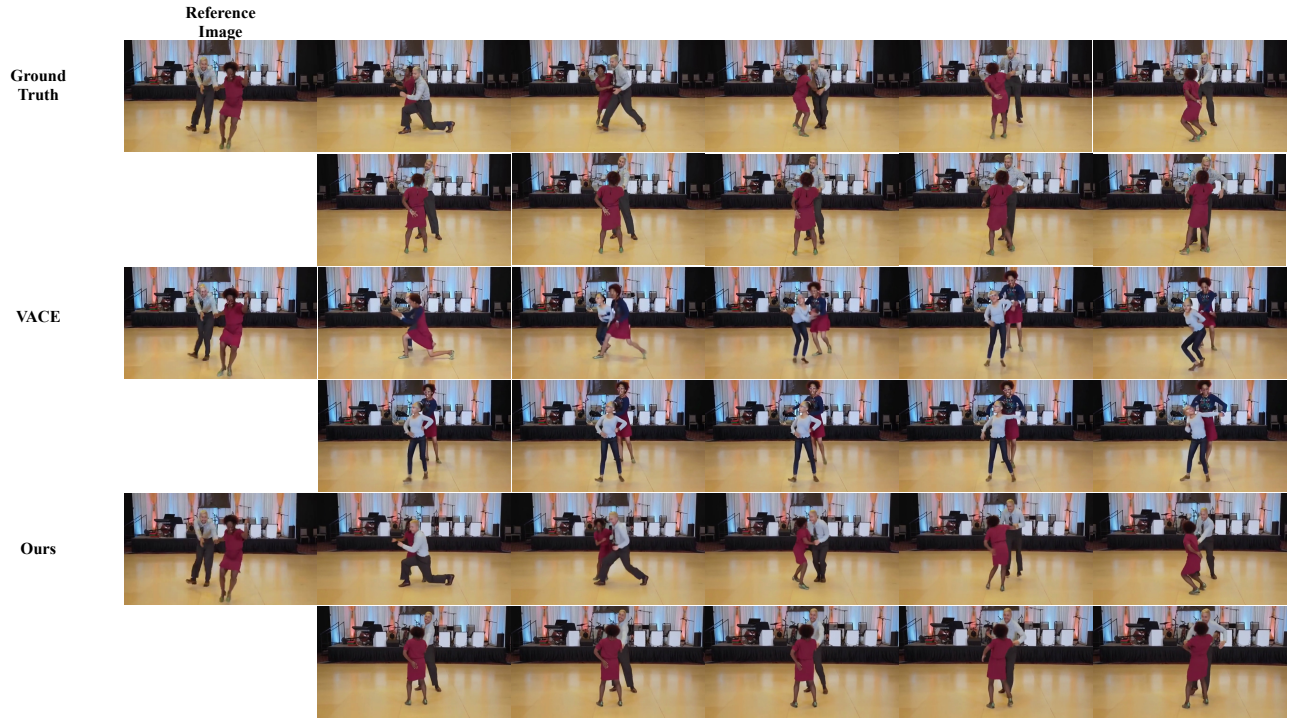

Figure 4. More comparing examples.

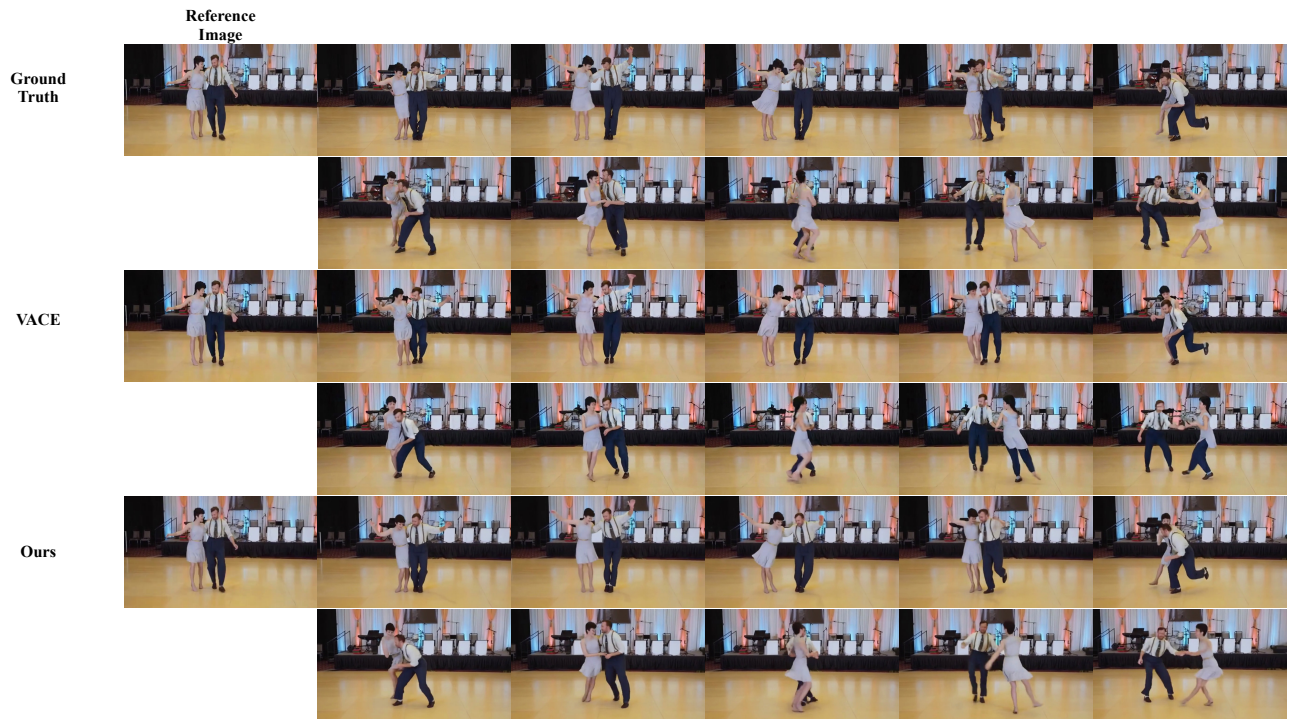

Figure 5. More comparing examples.

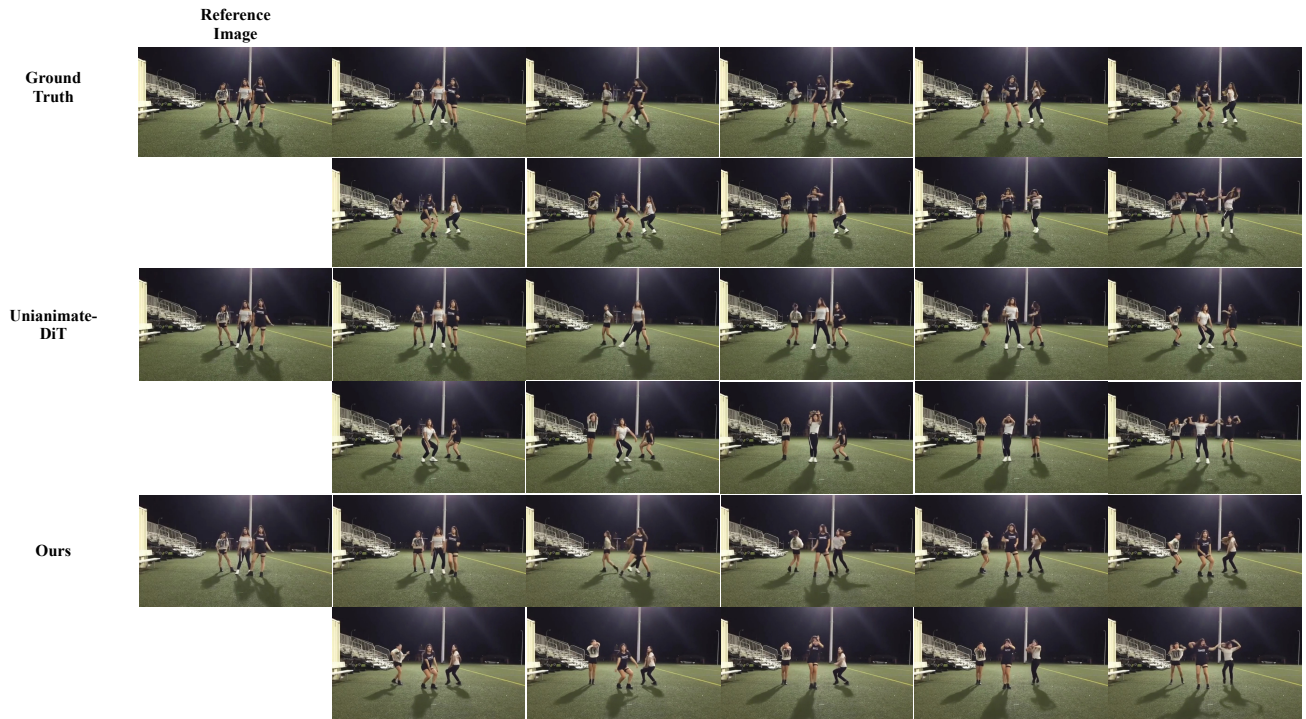

Figure 6. More comparing examples.

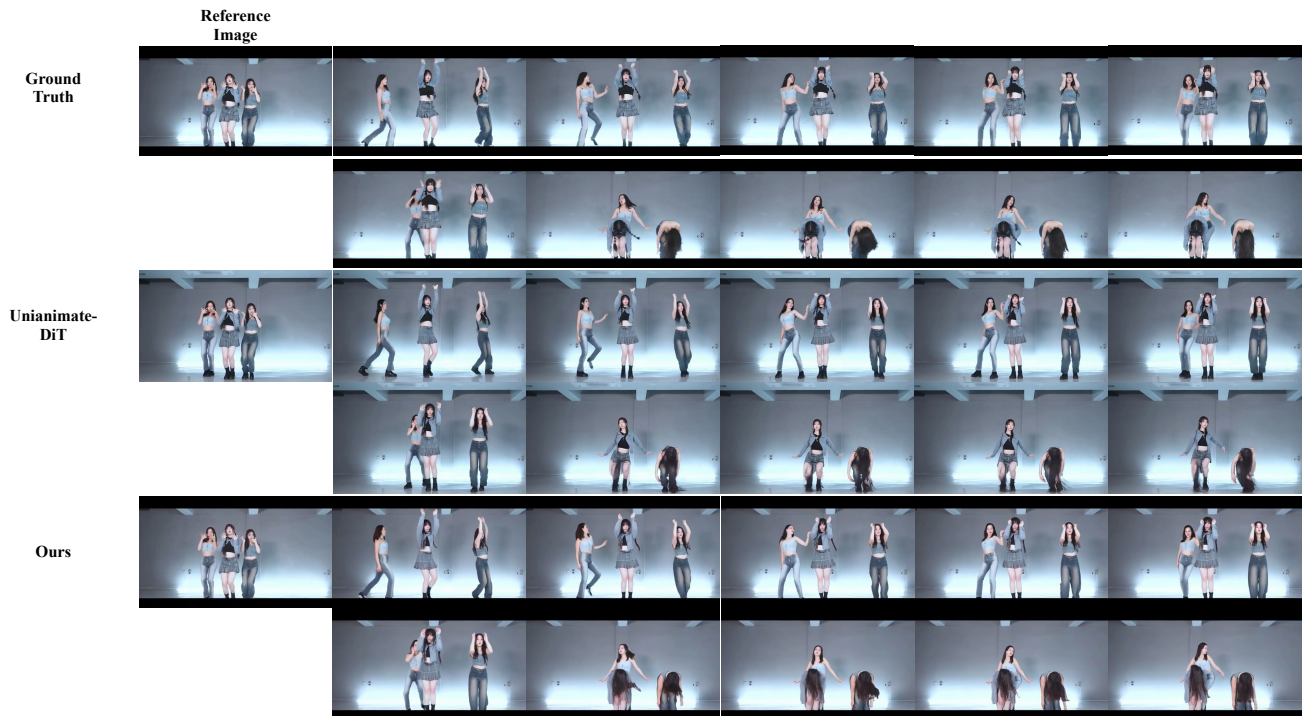

Figure 7. More comparing examples.

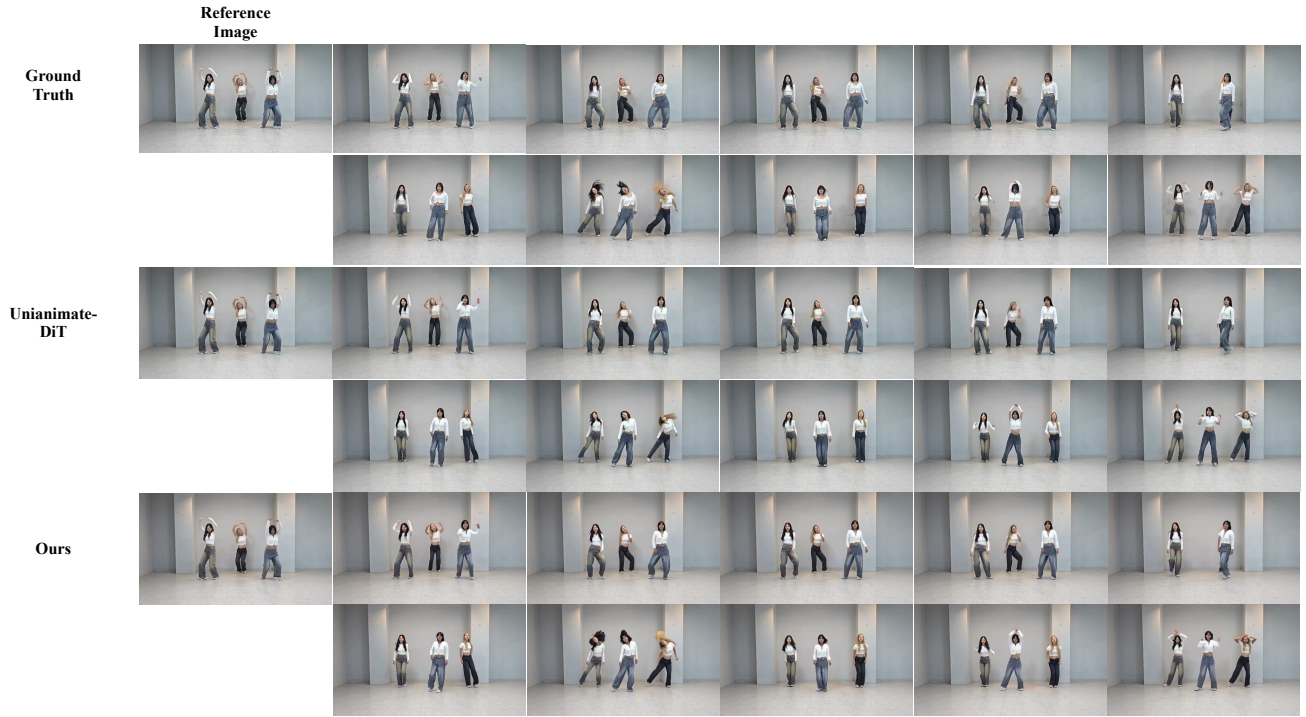

Figure 8. More comparing examples.

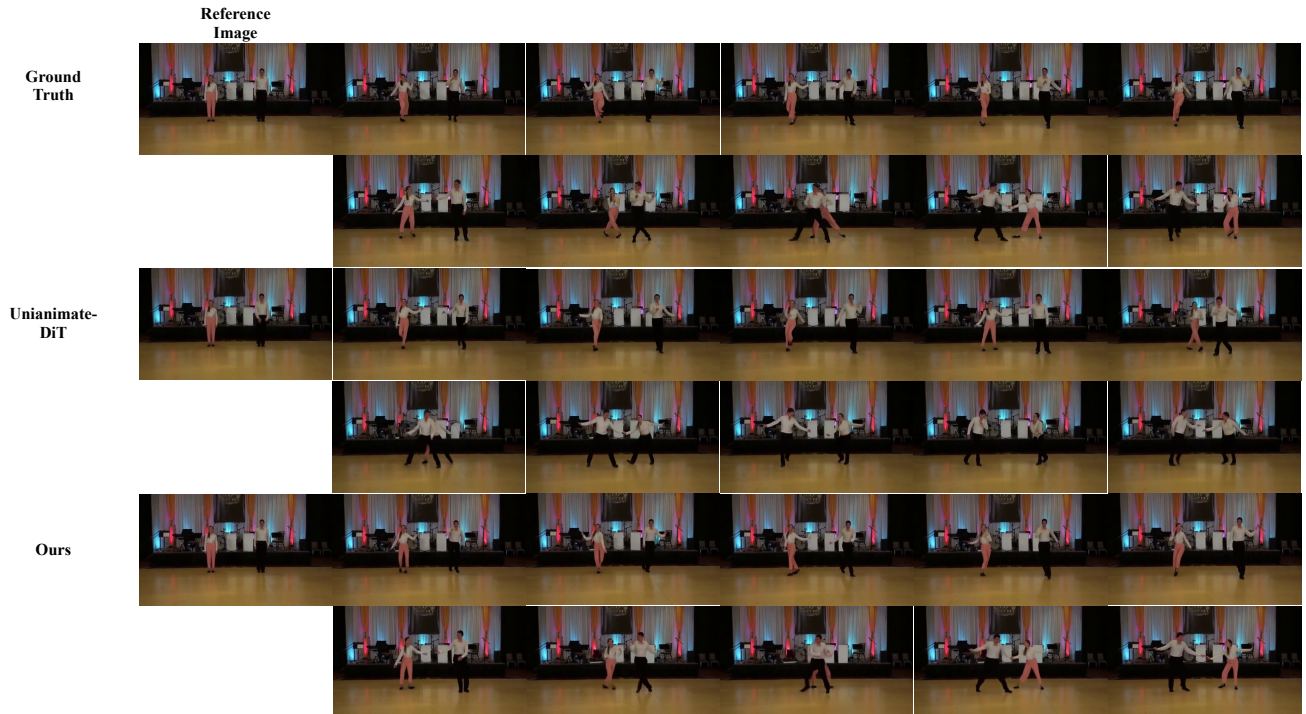

Figure 9. More comparing examples.
